# Supplementary material
Source: MDPI journal article supplement (https://www.mdpi.com/2072-4292/14/22/5841)
Supplement: s1 [file s1]

# Evaluation and Comparison of Spatio-Temporal Relationship between Multiple Satellite Aerosol Optical Depth (AOD) and Near-Surface PM<sub>2.5</sub> Concentration Over China

Qiangqiang Xu <sup>1,\*</sup>, Xiaoling Chen <sup>2</sup>, Dipesh Rupakheti <sup>3</sup>, Jiadan Dong <sup>2</sup>, Linling Tang <sup>4</sup>, Shichang Kang <sup>1,5</sup>

<sup>1</sup> State Key Laboratory of Cryospheric Science, Northwest Institute of Eco-Environment and Resources, Chinese

Academy of Sciences (CAS), Lanzhou 730000, China

<sup>2</sup> State Key Laboratory of Information Engineering in Surveying, Mapping and Remote Sensing, Wuhan

University, Wuhan 430079, China

<sup>3</sup> Jiangsu Key Laboratory of Atmospheric Environment Monitoring and Pollution Control, Collaborative

Innovation Center of Atmospheric Environment and Equipment Technology, Nanjing University of

Information Science & Technology, Nanjing 210044, China

<sup>4</sup> University of Chinese Academy of Sciences, Beijing 100049, China

<sup>5</sup> The School of Geography and Environment and Key Lab of Poyang Lake Wetland and Watershed Research of Ministry of Education, Jiangxi Normal University, Nanchang 330022, China

\* Corresponding: xuqiangqiang@nieer.ac.cn

Supplementary Table S1. The detailed information for 14 urban agglomerations in our study.

| Num | Urban Agglomeration   | Abbreviation | Total Area (×10 <sup>4</sup> km <sup>2</sup> ) | Cities included (number of cities)                                                                                                                                                                    |
|-----|-----------------------|--------------|------------------------------------------------|-------------------------------------------------------------------------------------------------------------------------------------------------------------------------------------------------------|
| 1   | Beijing-Tianjin-Hebei | BTH          | 22.6                                           | Beijing, Tianjin, Tangshan, Baoding, Shijiazhuang, Qinhuangdao, Langfang, Zhangjiakou, Chengde, Cangzhou, Xingtai, Handan, Hengshui, Dingzhou, Xinji, Anyang (16)                                     |
| 2   | Yangtze River Delta   | YRD          | 22.5                                           | Shanghai, Nanjing, Wuxi, Changzhou, Suzhou, Nantong, Yancheng, Yangzhou, Zhenjiang, Taizhou, Hangzhou, Ningbo, Jiaxing, Wenzhou, Huzhou, Shaoxing, Jinhua, Zhoushan, Taizhou, Hefei, Wuhu, Ma'anshan, |

|   |                           |     |      |                                                                                                                                                                                                                                                                                       |
|---|---------------------------|-----|------|---------------------------------------------------------------------------------------------------------------------------------------------------------------------------------------------------------------------------------------------------------------------------------------|
|   |                           |     |      | Tongling, Anqing, Chuzhou, Chizhou, Xuancheng (27)                                                                                                                                                                                                                                    |
| 3 | Pearl River Delta         | PRD | 42.2 | Guangzhou, Shenzhen, Zhuhai, Foshan, Dongguan, Huizhou, Zhongshan, Jiangmen, Zhaoqing, Sahnwei, Qingyuan, Yunfu, Heyuan, Shaoguan, Yangjiang (15)                                                                                                                                     |
|   |                           |     |      | Zhengzhou, Luoyang, Kaifeng, Nanyang, An'yang, Shangqiu, Xinxiang, Pingdingshan, Xuchang, Jiaozuo, Zhoukou, Xinyang, Zhumadian, Hebi, Puyang, Luohe, Sanmenxia, Jiyuan, Changzhi, Jincheng, Yuncheng, Liaocheng, Heze, Suzhou, Huaibei, Fuyang, Bengbu, Haozhou, Xingtai, Handan (30) |
| 4 | Central Plain             | CP  | 28.7 |                                                                                                                                                                                                                                                                                       |
| 5 | Chengyu                   | CY  | 18.5 | Chngqing, Chengdu, Zigong, Luzhou, Deyang, Mianyang, Suining, Neijiang, Leshan, Nanchong, Meishan, Yibin, Guang'an, Dazhou, Ya'an, Ziyang (16)                                                                                                                                        |
|   |                           |     |      | Wuhan, Huangshi, Ezhou, Huanggang, Xiaogan, Xianning, Xiantao,                                                                                                                                                                                                                        |
| 6 | Yangtze River Mid-Reaches | YRM | 31.7 | Qianjiang, Tianmen, Xiangyang, Yichang, Jinmen, Jinzhou, Changsha, Zhuzhou, Xiangtan, Yueyang, Yiyang, Changde, Hengyang, Loudi, Nanchang, Jiujiang, Jingdezhen, Yingtan, Xinyu, Yichun, Pingxiang, Shangrao, Fuzhou, Ji'an (31)                                                      |
|   |                           |     |      | Jinan, Qingdao, Yantai, Zibo, Linyi, Weifang, Dongying, Weihai,                                                                                                                                                                                                                       |
| 7 | Shandong Peninsula        | SP  | 7.3  | Rizhao, Zaozhuang, Heze, Jining, Tai'an, Laiwu, Binzhou, Dezhou, Liaocheng (17)                                                                                                                                                                                                       |
| 8 | Mid-Southern Liaoning     | MSL | 9.7  | Shenyang, Dalian, Anshan, Fushun, Benxi, Dandong, Liaoyang, Yingkou, Panjin (9)                                                                                                                                                                                                       |
| 9 | Hachang                   | HC  | 26.4 | Harbin, Daqing, Qiqihar, Suihua, Mudanjiang, Changchun, Jilin, Siping, Liaoyuan, Songyuan, Yanbian (11)                                                                                                                                                                               |

|    |                          |      |      |                                                                                                                                                                                                     |
|----|--------------------------|------|------|-----------------------------------------------------------------------------------------------------------------------------------------------------------------------------------------------------|
| 10 | Guanzhong Plain          | GZP  | 10.7 | Xi'an, Baoji, Xianyang, Tongchuan, Weinan, Shangluo, Yuncheng, Linfen, Tianshui, Pingliang, Qingyang (11)                                                                                           |
| 11 | HubaoEyu                 | HBEY | 17.5 | Hohhot, Baotou, Ordos, Yulin (4)                                                                                                                                                                    |
| 12 | Lanxi                    | LX   | 9.8  | Lanzhou, Xining, Haidong, Baiyin, Dingxi, Linxia Hui Autonomous Prefecture, Haibei Tibetan Autonomous Prefecture, Hainan Tibetan Autonomous Prefecture, Huangnan Tibetan Autonomous Prefecture (10) |
| 13 | Beibu_Gulf               | BG   | 11.7 | Nanning, Beihai, Qinzhou, Fangchenggang, Yulin, Chongzuo, Zhanjiang, Maoming, Yangjiang, Haikou, Danzhou, Dongfang, Chengmai, Lingao, Changjiang (15)                                               |
| 14 | West coast Taiwan Strait | WCTS | 12.4 | Fuzhou, Xiamen, Quanzhou, Putian, Zhangzhou, Sanming, Nanping, Ningde, Longyan, Wenzhou, Lishui, Quzhou, Shangrao, Yingtian, Fuzhou, Ganzhou, Shantou, Chaozhou, Jieyang, Meizhou (20)              |
